# Supplementary material for: Radiolabeling, Quality Control and In Vivo Imaging of Multimodal Targeted Nanomedicines
Source: MDPI journal article supplement (doi:10.3390/pharmaceutics14122679), 2022-12-01
Supplement: s1 [file s1]

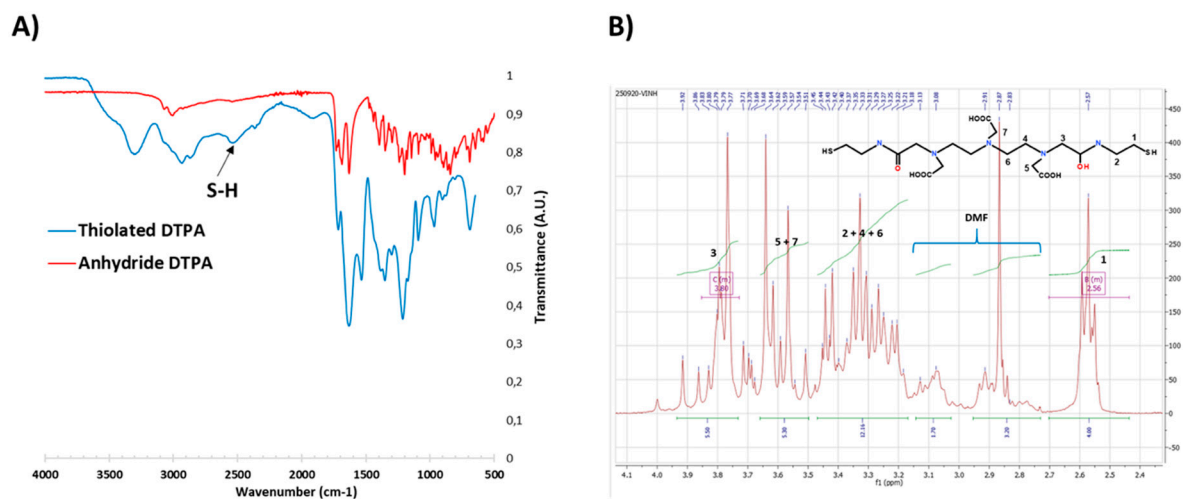

Fig.S1. FT-IR and  $^1\text{H}$ -NMR spectra of thiolated DTPA. A) FT-IR spectrum of DTPA-SH vs bi-anhydride DTPA; B)  $^1\text{H}$ -NMR in  $\text{D}_2\text{O}$  spectrum of DTPA-SH

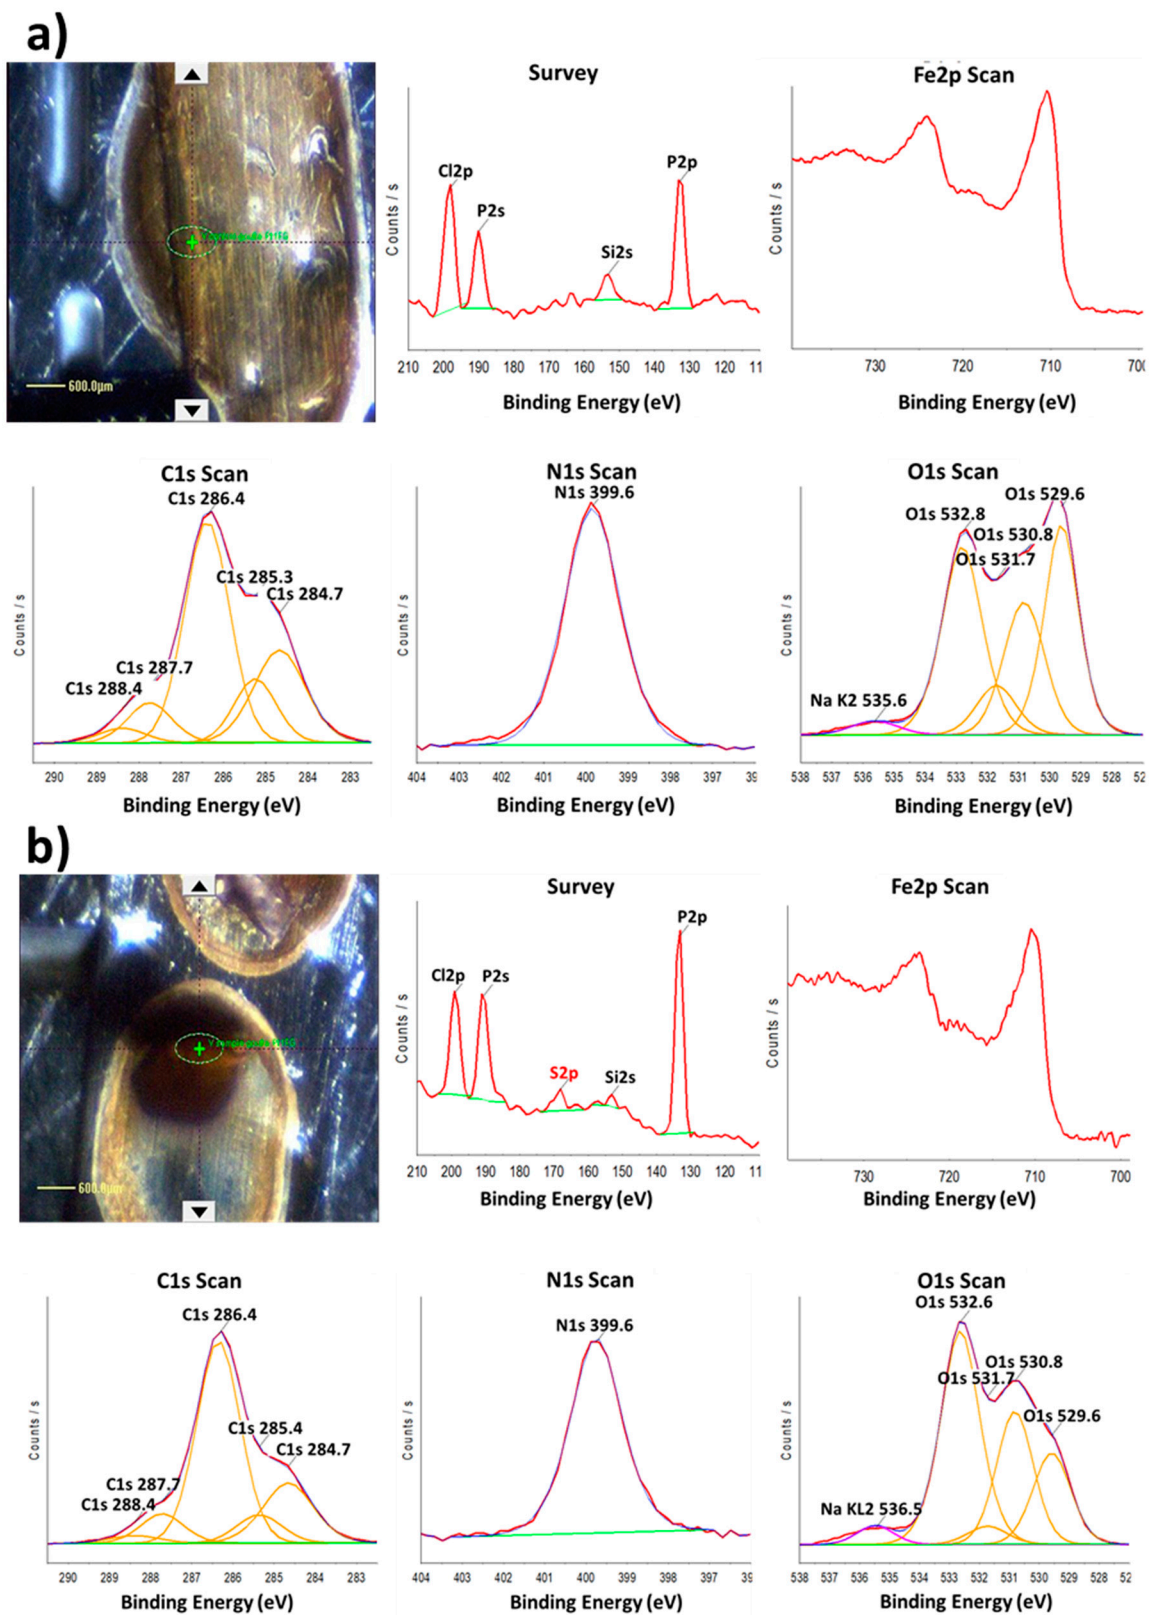

Fig.S2. Optical images of the analyzed area by XPS, part of survey focusing on S2p peak, Fe2p spectrum, and fitted C1s, O1s, N1s XPS spectra on NV-scFv (a) and NV-scFv-DTPA<sub>0.6</sub> (b) sample drops.

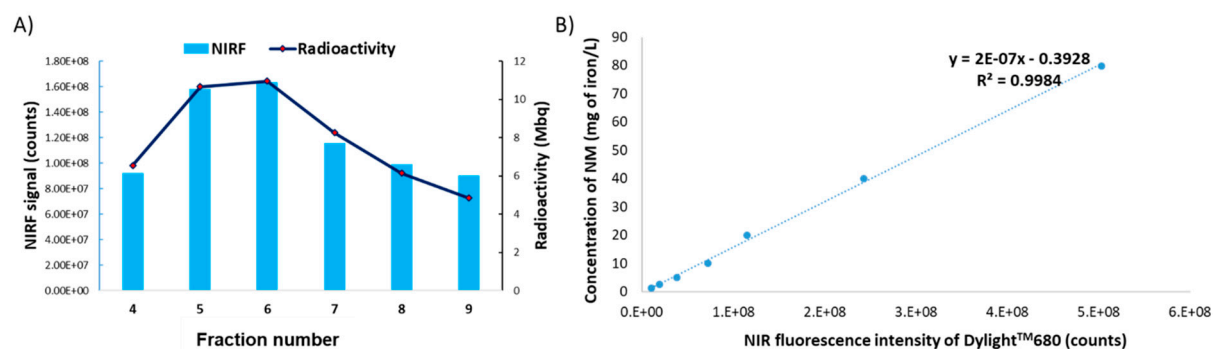

Fig.S3. A) Elution profiles of six fractions the most concentrated of NM-scFv-DTPA-<sup>111</sup>In after PD-10 column purification according to their NIRF intensity (histogram) and their radioactivity (curve); B) Calibration range of NM-scFv-DTPA (mg of iron/L) according to the NIRF intensity of Dylight™680 used for the calculation of injected formulation (Dilution factor: 15 µL of NM-scFv-DTPA diluted in 35 µL of PBS 1X).
